# Supplementary material for: A global map of emission clumps for future monitoring of fossil fuel CO 2 emissions from space
Source: Copernicus journal article supplement (doi:10.5194/essd-11-687-2019), 2019-05-17
Supplement: Supplementary file 2 [file essd-11-687-2019-supplement.zip]

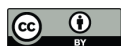

## *Supplement of*

# **A global map of emission clumps for future monitoring of fossil fuel CO<sub>2</sub> emissions from space**

**Yilong Wang et al.**

*Correspondence to:* Yilong Wang (yilong.wang@lsce.ipsl.fr)

- [essd-11-687-2019-supplement-title-page.pdf](#)
- [Connect\\_RWTargets.py](#)
- [PMIF\\_clump\\_supp.pdf](#)
- [README](#)
- [RWClump\\_morning.py](#)
- [batch\\_RandomWalker](#)

The copyright of individual parts of the supplement might differ from the CC BY 4.0 License.
